# Supplementary material
Source: Springer Nature journal article supplement (https://www.springermedizin.de/resource/supplementary/12974_2011_419_MOESM22_ESM.pdf/9601568)

## Amygdala

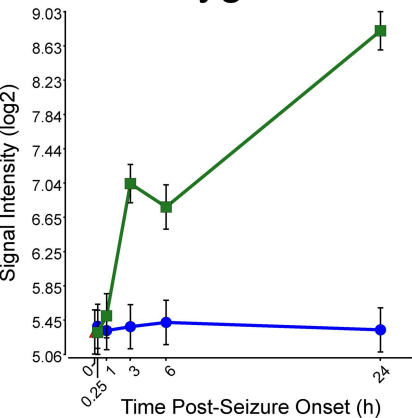

## Hippocampus

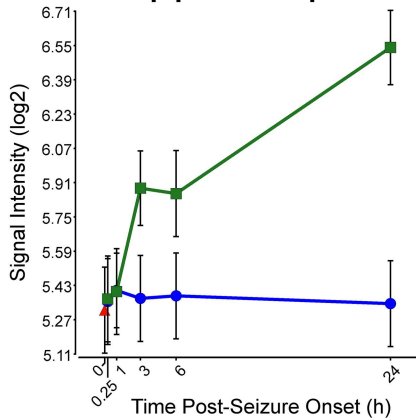

## Piriform Cortex

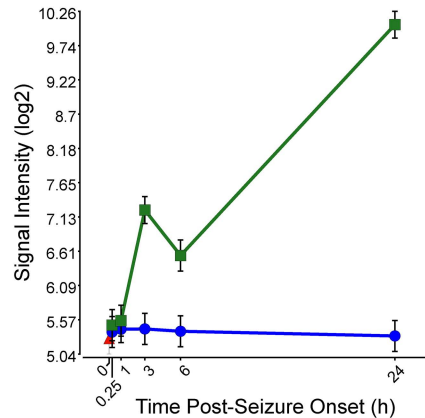

## Septum

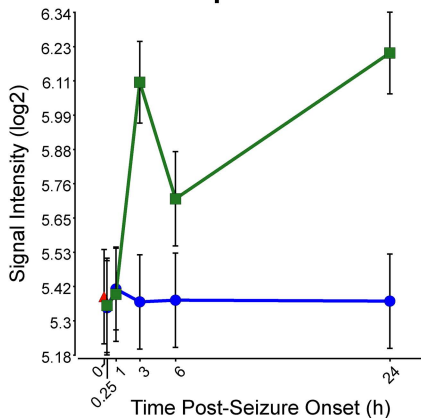

## Thalamus

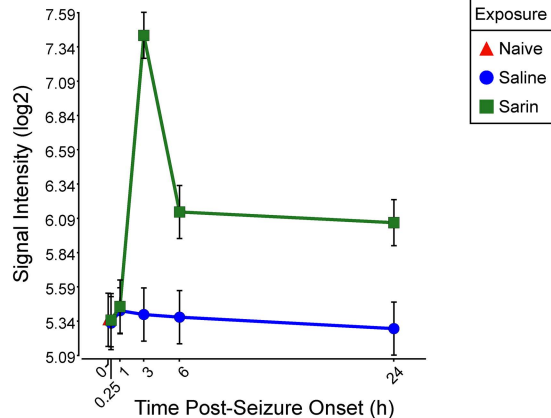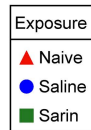

Supplement: MOESM22 [file 9601568]
